# Supplementary material for: An advanced and efficient Co3O4/C nanocomposite for the oxygen evolution reaction in alkaline media
Source: Royal Society of Chemistry journal article supplement (doi:10.1039/c9ra07224a), 2019-01-01
Supplement: c9ra07224a1.pdf [file c9ra07224a1.pdf]

## Advanced and efficient $\text{Co}_3\text{O}_4/\text{C}$ nanocomposite for the oxygen evolution reaction in alkaline media

Abdul Qayoom Mugheri<sup>a</sup>, Aneela Tahira<sup>b</sup>, Umair Aftab<sup>c</sup>, Muhammad Ishaq Abro<sup>c</sup>, Arfana Begum Mallah<sup>a</sup>, Gulam Zuhra Memon<sup>a</sup>, Humaira Khan<sup>a</sup>, Mazhar Ali Abbasi<sup>d</sup>, Imran Ali Halepoto<sup>d</sup>, Saleem Raza Chaudhry<sup>e</sup>, Zafar Hussain Ibupoto<sup>\*a</sup>

<sup>a</sup> Dr. M.A Kazi Institute of Chemistry University of Sindh Jamshoro, 76080, Sindh Pakistan

<sup>b</sup>Department of Science and Technology, Campus Norrkoping, Linkoping University, SE-60174 Norrkoping, Sweden

<sup>c</sup>Mehran University of Engineering and Technology, 7680 Jamshoro, Sindh Pakistan

<sup>d</sup>Institute of Physics, University of Sindh Jaamshoro, 76080, Sindh Pakistan

<sup>e</sup>University of Engineering and Technology, Lahore

\*Corresponding author: Zafar Hussain Ibupoto

Email address: zaffar.ibhupoto@usindh.edu.pk

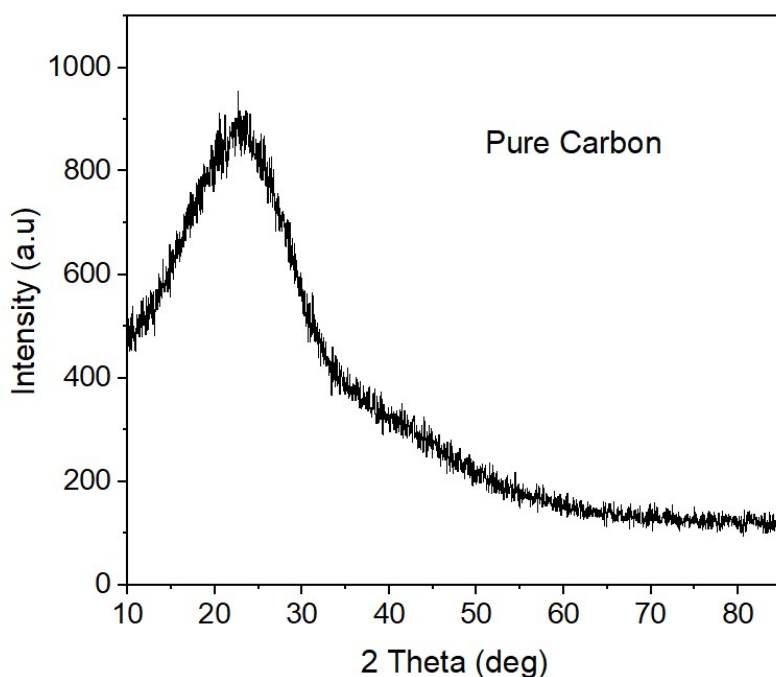

**S1:** XRD patterns of pure carbon obtained from the dehydration of sucrose
